# Supplementary material for: Amp-TB2 Protocol and Its Application to Amphiboles from Recent, Historical and Pre-historical Eruptions of Bezymianny Volcano, Kamchatka
Source: Preprints.org preprint supplement (doi:10.20944/preprints202309.2133.v1), 2023-09-30
Supplement: Supplementary file 1 [file Bez. Amp-TB2.1 results.xlsx]

## Sheet: Recent Bezymianny
								Amphibole composition (wt%)													Amp-TB2.1 Physico-chemical parameters
Reference	Date	Info	Sample	Crystal	profile	step (µm)		SiO2	TiO2	Al2O3	Cr2O3	FeO	MnO	MgO	CaO	Na2O	K2O	F	Cl		T (°C)	error2	P (MPa)	ΔNNO	error^2	logfO2	H2Omelt (wt%)
Turn et al. (2013)°	OCTOBER 1955 - March 30, 1956	pre-climatic ash, lowest layer	06IPE10	microph #2	spots
N (number of measures)								3
Average								44.0566	1.4329	10.1976		14.8574	0.52915	12.9146	10.5627	1.76831	0.373828	0.385285	0.0393323		882.911	484	264.303	0.446177		-11.7242	5.39167
σ								0.294007	0.198264	0.178427		0.284369	0.204493	0.353385	0.0339137	0.108827	0.0340367	0.216331	0.0213482		24.2385		4.90544			0.476837	1.08286
Check σ/σ%								ok	0.0659821	ok		0.00397889	0.102676	0.0854642	ok	ok	ok	0.125929	ok				1.85599				20.0839
Turn et al. (2013)°	OCTOBER 1955 - March 30, 1956	pre-climatic ash, lowest layer	06IPE10	microph #4	core-rim	6
N (number of measures)								5
Average								44.0566	1.4329	10.1976		14.8574	0.52915	12.9146	10.5627	1.76831	0.373828	0.385285	0.0393323		882.911	484	264.303	0.446177		-11.7242	5.39167
σ								0.294007	0.198264	0.178427		0.284369	0.204493	0.353385	0.0339137	0.108827	0.0340367	0.216331	0.0213482		24.2385		4.90544			0.476837	1.08286
Check σ/σ%								ok	0.0659821	ok		0.00397889	0.102676	0.0854642	ok	ok	ok	0.125929	ok				1.85599				20.0839
Turn et al. (2013)°	OCTOBER 1955 - March 30, 1956	pre-climatic ash, 2nd layer	06IPE11	phen #2	core-rim	5
N (number of measures)								10
Average								44.3606	1.68379	9.43838		14.4456	0.450786	13.0779	10.7741	1.62906	0.379197	0.186497	0.0593096		866.942	484	220.46	0.281196		-12.202	5.29614
σ								0.44009	0.248544	0.336761		0.110783	0.119284	0.189978	0.219575	0.105949	0.040481	0.0424801	0.0122848		22.335		24.687			0.464508	0.660249
Check σ/σ%								0.034274	0.103651	0.0874904		ok	0.0201645	ok	ok	ok	ok	ok	ok				11.1979				12.4666
Turn et al. (2013)°	OCTOBER 1955 - March 30, 1956	pre-climatic ash, 2nd layer	06IPE11	phen #3	core-rim	5
N (number of measures)								4
Average								45.3774	1.71117	10.199		13.197	0.415392	13.095	10.784	1.60257	0.30986	0.234655	0.079258		868.825	484	259.247	-0.380329		-12.8058	5.92432
σ								0.433569	0.12378	0.30742		0.496291	0.0288505	0.22329	0.0684818	0.105274	0.0298315	0.13553	0.0197225		6.95351		13.1678			0.121695	0.510739
Check σ/σ%								0.0270856	ok	0.0623579		0.228858	ok	ok	ok	ok	ok	0.0673042	ok				5.07924				8.62106
Turn et al. (2013)°	MARCH 30, 1956	Climatic erupt., Andesite of the directed blast	05IPE23a/A	phen #2	core-rim	5
N (number of measures)								7
Average 0-30 µm								42.0946	2.31911	11.9385		14.7333	0.288961	12.5137	11.1453	2.18877	0.528559	0.484734	0.0395133		918.143	484	358.258	0.903632		-10.608	6.04164
σ								0.452985	0.202059	0.114023		0.638337	0.118651	0.164588	0.0760806	0.226576	0.0586731	0.196709	0.0190179		20.635		32.8787	0.432421		0.379981	0.752158
Check σ/σ%								0.0567183	0.0537321	ok		0.360732	0.0454363	ok	ok	0.0811301	ok	0.10946	ok				9.17736				12.4496
N (number of measures)								18
Average 55-140 µm								40.057	1.93999	14.4842		11.7985	0.125939	14.4754	11.4661	2.37224	0.365494	0.397236	0.0250227		967.871	484	588.614	2.99752		-7.61179	7.48163
σ								0.395905	0.240012	0.368868		0.807979	0.0693999	0.256829	0.20196	0.0813186	0.0372877	0.213784	0.0130662		16.4133		63.7981	0.344631		0.368416	0.713716
Check σ/σ%																							10.8387				9.53958
Turn et al. (2013)°	MARCH 30, 1956	Climatic erupt., Pyroclastic flow	05IPE24b	phen #1	core-rim	5
N (number of measures)								4
Average 30-45 µm								43.2097	1.86233	12.0827		13.9885	0.302954	13.006	11.0512	2.09925	0.495822		0.068801		907.856	#DIV/0!	375.136	1.1131		-10.5652	6.54527
σ								0.322456	0.288377	0.299076		0.505505	0.168445	0.0811543	0.115633	0.212177	0.0400522		0.00248247		10.4792	#DIV/0!	20.3524	0.53255		0.482087	0.717537
Check σ/σ%								ok	0.15068	0.0395216		0.232739	0.0940468	ok	ok	0.0687749	ok		ok				5.42534				10.9627
N (number of measures)								6
Average 5-20+55-60 µm								44.0743	1.75409	10.4874		14.3694	0.363761	13.1039	11.0962	1.63949	0.424575		0.058326		873.22	484	261.472	0.659189		-11.6849	6.05716
σ								0.283239	0.2168	0.244955		0.236704	0.0822634	0.214732	0.0899464	0.136526	0.028818		0.0151385		8.79823		10.3441	0.36737		0.358514	0.550443
Check σ/σ%								ok	0.0818697	ok		ok	0.00310605	ok	ok	0.00465162	ok		ok				3.95611				9.08748
Turn et al. (2013)°	MARCH 30, 1956	Climatic erupt., Pyroclastic flow	05IPE24b		core-rim	5
N (number of measures)								4
Average 25-40 µm								45.5846	2.04159	9.59335		14.2459	0.326817	13.5307	11.2936	1.5085	0.460174	0.244206	0.0568623		855.724	484	208.672	0.325585		-12.3705	5.62043
σ								0.192249	0.177854	0.143894		0.410915	0.108098	0.150846	0.131831	0.0682851	0.0318067	0.210757	0.0124854		14.9379		6.98446			0.0597682	0.528513
Check σ/σ%								ok	0.0358001	ok		0.136457	0.0317629	ok	ok	ok	ok	0.141602	ok				3.34709				9.40343
Turn et al. (2013)°	MARCH 30, 1956	Climatic erupt., Pyroclastic flow	05IPE24b	phen #3	core-rim	5
N (number of measures)								12
Average 30-85 µm								45.6473	1.72999	9.10658		13.6845	0.296377	13.8234	11.2986	1.4848	0.411425	0.349495	0.0454903		840.846	484	188.397	0.669291		-12.3232	5.96674
σ								0.382328	0.389696	0.24766		0.691892	0.0622066	0.277561	0.141399	0.110961	0.0396583	0.216414	0.0158976		13.4202		9.03481			0.263271	0.686069
Check σ/σ%								ok	0.255398	0.0118313		0.42115	ok	0.00588997	ok	ok	ok	0.138323	ok			#DIV/0!	4.79562				11.4982
Turn et al. (2013)°	MARCH 30, 1956	Climatic erupt., Pyroclastic flow	05IPE24b	microph #1a	core-rim	5
N (number of measures)								15
Average 0-75 µm								44.0719	1.98474	9.46892		14.4606	0.270802	13.1878	11.1263	1.68816	0.49284	0.222723	0.0674021		856.164	484	203.551	0.813222		-11.8627	5.78874
σ								0.265855	0.245431	0.112764		0.396467	0.104961	0.252825	0.1378	0.0771763	0.0356968	0.133348	0.0201281		16.772		10.5104			0.433003	0.592449
Check σ/σ%								ok	0.10473	ok		0.120614	0.0333394	ok	ok	ok	ok	0.0663179	ok				5.16352				10.2345
Turn et al. (2013)°	MARCH 30, 1956	Climatic erupt., Pyroclastic flow	05IPE24b	microph #2a	core-rim	5
N (number of measures)								9
Average 30-70 µm								44.1161	1.75576	9.22993		14.2335	0.343622	13.6148	10.9424	1.68152	0.385123	0.27096	0.0721263		863.971	484	202.559	0.884327		-11.6544	5.35865
σ								0.257517	0.179837	0.101968		0.316691	0.0957617	0.121426	0.0787993	0.118447	0.0257375	0.144562	0.0204461		9.59775		7.89978			0.186498	0.408771
Check σ/σ%								ok	0.0448639	ok		0.0423136	0.018118	ok	ok	ok	ok	0.072926	ok				3.89999				7.62825
Turn et al. (2013)°	MARCH 30, 1956	Climatic erupt., Pyroclastic flow	05IPE24b	microph #3a	core-rim	5
N (number of measures)								18
Average 30-70 µm								44.9657	1.83956	8.62803		13.9995	0.384728	13.8893	11.1503	1.60403	0.409521	0.246783	0.0546409		856.096	484	177.444	0.811961		-11.8935	5.14398
σ								0.542902	0.284452	0.308716		0.483871	0.113852	0.283805	0.135719	0.104527	0.0369173	0.229664	0.0204121		20.0001		15.6163	0.420501		0.369564	0.71791
Check σ/σ%								0.137672	0.147328	0.077164		0.211032	0.0331767	0.0116962	ok	ok	ok	0.160263	ok				8.80065				13.9563
This work	1956 (B-III)	Pyroclastic flow, 1956	Bez97-5-2-1	phen 1	core-rim	20
N (number of measures)								6
Average 0-99 µm								41.451	1.843	15.1426	0.0281971	12.6936	0.165614	13.3424	11.3284	2.32669	0.390967	0.0680102	0.0163702		943.973	484	580.338	1.82997		-9.16062	8.42915
σ								0.135026	0.0781154	0.211027	0.0302964	0.158564	0.0244831	0.138794	0.105426	0.041196	0.00674958	0.040219	0.00293065		2.51301		26.5694			0.114821	0.24217
Check σ/σ%								ok	ok	ok	ok	ok	ok	ok	ok	ok	ok	ok	ok				4.57826				2.87301
N (number of measures)								4
Average 184-247 µm								41.2671	1.88348	15.4737	0.0292187	11.4101	0.129267	14.4307	11.2747	2.42822	0.343483	0.0329752	0.0152662		978.217	484	740.598	2.40861		-7.98142	7.92584
σ								0.173343	0.0459191	0.274592	0.0288447	0.120053	0.00474174	0.135859	0.0680245	0.106749	0.00982257	0.0259964	0.00560208		5.9131		34.2022			0.171965	0.185261
Check σ/σ%								ok	ok	ok	ok	ok	ok	ok	ok	ok	ok	ok	ok				4.61819				2.33743
This work	1956 (B-III)	Pyroclastic flow, 1956	M2020-1	phen 2	line 1-core	2.5
N (number of measures)								5
Average 0-12.5 µm								44.0953	2.98883	9.86649	0.0743543	13.0872	0.17077	14.1811	11.4799	1.79906	0.670667	0.136429	0.0994842		899.249	484	227.203	1.08144		-10.8048	4.77975
σ								0.245197	0.0432046	0.122806	0.0344147	0.200995	0.0276453	0.20506	0.195886	0.041642	0.0338827	0.0168971	0.00639082		6.40689		6.7236	0.181918		0.27195	0.176298
Check σ/σ%								ok	ok	ok		ok	ok	ok	ok	ok	ok	ok	ok				2.9593				3.68844
This work	1956 (B-III)	Pyroclastic flow, 1956	M2020-1	phen 2	line 2-mantle	2.5
N (number of measures)								8
Average 0-20 µm								46.7483	2.02115	7.92166	0.0368684	12.0772	0.156479	15.7027	11.5646	1.50948	0.516719	0.122055	0.108649		839.324	484	146.643	1.83453		-11.2026	5.31731
σ								0.312433	0.041727	0.101531	0.0356753	0.128476	0.03172	0.197156	0.155554	0.0732398	0.0219581	0.060974	0.00335458		3.74281		3.10857	0.225597		0.27736	0.172989
Check σ/σ%								ok	ok	ok		ok	ok	ok	ok	ok	ok	0.0063081	ok				2.11983				3.25332
This work	1956 (B-III)	Pyroclastic flow, 1956	M2020-1	phen 2	line 3-rim	2.5
N (number of measures)								9
Average 0-22.5 µm								46.1504	2.30175	8.66618	0.0513516	11.9939	0.174121	15.3978	11.4815	1.62507	0.56701	0.144105	0.112562		862.961	484	176.04	1.51545		-11.0543	4.9594
σ								0.196389	0.0528905	0.0953611	0.0340725	0.131003	0.032909	0.074819	0.113518	0.0646402	0.0221357	0.137176	0.00470103		6.29968		4.59791	0.0689589		0.0788751	0.147887
Check σ/σ%								ok	ok	ok		ok	ok	ok	ok	ok	ok	0.079344	ok				2.61185				2.98195
This work	1956 (B-III)	Pyroclastic flow, 1956	M2020-1	phen 1	core-rim	24
N (number of measures)								4
Average 0-72 µm								42.0786	1.62003	13.7797	0.0175452	14.7422	0.278628	12.6123	11.0752	2.18539	0.375038	0.0286729	0.0374929		922.829	484	484.902	1.26481		-10.1137	7.7251
σ								0.113214	0.0547035	0.276814	0.0196167	0.283621	0.0708593	0.215683	0.0397019	0.0597904	0.0186986	0.0297445	0.00415668		4.95736		11.9191			0.103085	0.426711
Check σ/σ%								ok	ok	0.00543422	ok	0.00595797	ok	ok	ok	ok	ok	ok	ok				2.45805				5.5237
This work	1956 (B-III)	Pyroclastic flow, 1956	M2020-1	phen 4	core-rim	15
N (number of measures)								5
Average 0-61 µm								42.7807	1.90176	14.3554	0.0678603	11.1047	0.116642	14.6253	11.3397	2.31001	0.410488	0.111411	0.0130617		949.773	484	552.865	2.15242		-8.75505	7.62372
σ								0.0945183	0.0271542	0.115211	0.015614	0.311903	0.0223694	0.333746	0.108881	0.0608627	0.00757362	0.0430861	0.0026361		3.75491		14.8194			0.264458	0.0997529
Check σ/σ%								ok	ok	ok	ok	0.0596696	ok	0.0568318	ok	ok	ok	ok	ok				2.68047				1.30845
This work	1956 (B-III)	Pyroclastic flow, 1956	M2020-1	phen 3	core-rim	3
N (number of measures)								8
Average 65-89 µm								44.6014	1.5962	9.97173	0.0227269	14.2954	0.301196	13.7951	10.6833	1.64377	0.344015	0.0555122	0.0544022		870.053	484	240.252	0.852911		-11.558	5.71723
σ								0.19664	0.0471129	0.116215	0.0408441	0.132694	0.0301734	0.162729	0.0685676	0.0568652	0.0163741	0.0298163	0.00638447		5.50177		7.11619			0.140227	0.182318
Check σ/σ%								ok	ok	ok	0.00992395	ok	ok	ok	ok	ok	ok	ok	ok				2.96196				3.18892
Turn et al. (2013)°	March 10, 1965	post-climatic erupt.	B-64	phen #2	core spots
N (number of measures)								5
Average								44.1912	1.92924	8.76165		15.267	0.445207	13.1958	10.9539	1.64122	0.57578	0.347069	0.11075		861.382	484	184.053	1.01655		-11.5184	4.97219
σ								0.291017	0.280742	0.106698		0.206647	0.0519617	0.275554	0.114864	0.0739306	0.0412992	0.381706	0.0146921		13.9691		7.52035			0.444599	0.314082
Check σ/σ%								ok	0.141387	ok		ok	ok	0.00812827	ok	ok	ok	0.303799	ok				4.08596				6.31677
Turn et al. (2013)°	July 12, 1973	post-climatic erupt.	I-4080	phen #2	core spots
N (number of measures)								9
Average								43.0356	2.38914	10.3992		14.0064	0.285518	13.2412	11.0617	2.21708	0.462845	0.464289	0.0449427		902.421	484	252.332	0.768983		-11.0551	5.19599
σ								0.481888	0.313264	0.168337		0.413608	0.0727097	0.256803	0.110066	0.168235	0.0332505	0.135002	0.0234512		16.4964		12.1112			0.316124	0.596417
Check σ/σ%								0.0826409	0.163434	ok		0.140723	ok	ok	ok	0.0221541	ok	0.0490182	ok				4.79971				11.4784
Turn et al. (2013)°	1974	post-climatic erupt.	B-74	phen #1	core spots
N (number of measures)								4
Average								41.8956	1.93786	12.8964		12.2432	0.136126	14.0704	11.2832	2.31922	0.379572	0.116922	0.0258723		931.276	484	428.273	2.08294		-9.17887	7.13343
σ								0.214647	0.307946	0.244114		0.527934	0.0684446	0.391655	0.288645	0.0803306	0.0139782	0.0549669	0.0213025		19.0399		29.847			0.450609	0.909544
Check σ/σ%								ok	0.168381	ok		0.267216	0.0117187	0.118349	0.0350446	ok	ok	0.00109151	ok				6.96917				12.7504
Turn et al. (2013)°	March 25, 1977	post-climatic erupt.	B-77024	phen #1	core spots
N (number of measures)								7
Average								43.3835	2.70684	9.90441		13.4389	0.258257	13.5006	11.233	2.14707	0.505389	0.25352	0.0532555		899.758	484	226.383	0.628005		-11.2511	4.85337
σ								0.383715	0.157986	0.176864		0.421045	0.0699969	0.125883	0.106152	0.162534	0.0366178	0.205048	0.0296419		13.3221		7.90187			0.32383	0.400237
Check σ/σ%								ok	0.0016784	ok		0.151959	ok	ok	ok	0.0180336	ok	0.13501	ok				3.49049				8.24658
Turn et al. (2013)°	June 29, 1985	post-climatic erupt.	GB-1485/B	phen #1	core spots
N (number of measures)								8
Average								41.5362	1.80427	12.5421		12.6033	0.20178	14.213	11.0926	2.32765	0.402723	0.155325	0.0179963		940.836		439.829			-8.67509	6.50652
σ								0.237997	0.262679	0.18508		0.472721	0.0774935	0.23527	0.19105	0.0799141	0.0182033	0.134181	0.0103438		20.8417		49.3387			0.343011	0.747856
Check σ/σ%								ok	0.126453	ok		0.209428	0.0126706	ok	ok	ok	ok	0.0748604	ok				11.2177				11.4939
This work	1990 (B-III)	Summit extrusion, lava dome Novy, 1990	Bez-O4-1	phen 1	core-rim	17
N (number of measures)								21
Average 0-345 µm								42.1728	2.25984	13.7181	0.0353177	11.9864	0.144906	13.3034	10.9326	2.16929	0.374207	0.078474	0.0220209		936.719	484	487.329	0.842858		-10.3027	7.22208
σ								0.348136	0.0551225	0.223313	0.0396481	0.278169	0.0272119	0.247593	0.226201	0.0591376	0.0264317	0.0407236	0.00355382		8.28643		23.0991			0.184	0.33787
Check σ/σ%								ok	ok	ok	0.00374395	0.0193172	ok	ok	ok	ok	ok	ok	ok				4.73993				4.6783
N (number of measures)								9
Average 362-500 µm								41.3808	2.34532	14.0135	0.018559	12.6598	0.140857	12.5555	11.1032	2.1437	0.429253	0.079233	0.026197		930.888	484	496.292	0.75897		-10.4812	7.77051
σ								0.443563	0.0713441	0.634716	0.0289083	0.681876	0.0488055	0.310597	0.117595	0.103502	0.0286591	0.0354937	0.0066251		10.4226		41.0666			0.313816	0.401572
Check σ/σ%								0.0495878	ok	0.361784	4.04176e-05	0.418184	ok	0.0476431	ok	ok	ok	ok	ok				8.27469				5.1679
N (number of measures)								16
Average 517-775 µm								42.8506	2.31868	12.0751	0.0248499	13.6385	0.204056	12.5949	10.9539	1.92818	0.457838	0.059764	0.0408243		907.423	484	374.301	0.318114		-11.367	6.61148
σ								0.316937	0.0846141	0.163315	0.0282842	0.2117	0.023533	0.133659	0.172466	0.0520872	0.0163271	0.0402928	0.00384299		5.90451		13.2414			0.212986	0.139477
Check σ/σ%								ok	ok	ok	ok	ok	ok	ok	ok	ok	ok	ok	ok				3.53763				2.10962
N (number of measures)								3
Average 810-844 µm								44.8835	1.68378	9.84286	0.0263568	13.7721	0.277355	13.2056	10.8981	1.54792	0.411042	0.061292	0.0573735		852.133	484	229.52	0.413108		-12.3407	6.30899
σ								0.357521	0.0362691	0.279388	0.0282732	0.353765	0.0129958	0.274724	0.0393487	0.0264719	0.0278596	0.0529245	0.0082556		3.02372		15.5167			0.340929	0.320218
Check σ/σ%								ok	ok	0.0372609	ok	0.082437	ok	0.00723169	ok	ok	ok	0.00964279	ok				6.76051				5.07559
This work	1990 (B-III)	Summit extrusion, lava dome Novy, 1990	Bez-O4-1	phen 2	core-rim	10
N (number of measures)								6
Average 0-52 µm								42.1548	1.797	14.4689	0.0140362	12.0977	0.143017	13.6033	11.1386	2.21835	0.438865	0.0350157	0.0154042		930.543	484	530.991	1.83218		-9.39905	8.21827
σ								0.311211	0.0473627	0.255188	0.0175595	0.168619	0.0127216	0.169117	0.113796	0.0789486	0.0259543	0.0226451	0.00365774		7.43124		32.4771			0.330281	0.24102
Check σ/σ%								ok	ok	ok	ok	ok	ok	ok	ok	ok	ok	ok	ok				6.11631				2.93274
N (number of measures)								11
Average 185-240 µm								41.5903	1.84092	15.2235	0.0199484	11.1087	0.129064	14.3633	11.3803	2.36313	0.380188	0.040194	0.0138125		958.489	484	632.006	2.3854		-8.35374	8.19276
σ								0.211524	0.0573552	0.228308	0.0289012	0.240088	0.0270509	0.180445	0.141593	0.0655569	0.0144365	0.0410353	0.00289333		9.96422		56.4894			0.178071	0.33013
Check σ/σ%								ok	ok	ok	ok	ok	ok	ok	ok	ok	ok	0.00352202	ok				8.9381				4.02954
This work	1990 (B-III)	Summit extrusion, lava dome Novy, 1990	Bez-O4-3	phen 1	core-rim	3
N (number of measures)								22
Average 0-18,38-69,135-199,247-266 µm								44.3541	1.65802	10.0863	0.0194275	14.5112	0.305356	13.4187	10.8447	1.68463	0.405297	0.076156	0.0659944		867.212	484	240.644	0.850418		-11.6131	5.91049
σ								0.380249	0.112455	0.174786	0.0225015	0.25828	0.0475473	0.225409	0.172666	0.0872552	0.0513719	0.0347817	0.00614099		6.34998		10.8925			0.209397	0.233242
Check σ/σ%								ok	ok	ok	ok	ok	ok	ok	ok	ok	ok	ok	ok				4.52639				3.94624
This work	1990 (B-III)	Summit extrusion, lava dome Novy, 1990	Bez-O4-3	phen 2	core-rim	3
N (number of measures)								10
Average 0-37 µm								41.4365	1.91932	15.4423	0.0196507	11.356	0.135911	14.2449	11.2513	2.42155	0.344663	0.116982	0.0179779		971.338	484	705.693	2.16757		-8.34315	7.99866
σ								0.224689	0.0230727	0.167706	0.0378299	0.265048	0.0366278	0.210876	0.0961803	0.0482949	0.0206685	0.0517119	0.00421354		12.684		59.8473			0.337791	0.374235
Check σ/σ%								ok	ok	ok	0.00839727	0.0108945	ok	ok	ok	ok	ok	ok	ok				8.48065				4.67872
N (number of measures)								16
Average 41-95 µm								42.0738	2.1427	13.7971	0.0337921	13.0971	0.207403	13.6397	11.0432	2.27422	0.422225	0.0793567	0.0284255		952.815	484	539.443	1.50349		-9.36844	6.68177
σ								0.482725	0.189446	0.944454	0.0413155	1.31636	0.0504143	0.741063	0.154143	0.103288	0.038333	0.0385561	0.0065864		16.9988		107.019			0.8835	0.516678
Check σ/σ%								0.0865251	0.0450447	0.672958	0.00594481	1.04962	ok	0.470622	ok	ok	ok	ok	ok				19.8388				7.73265
N (number of measures)								10
Average 98-129 µm								44.6551	1.84021	10.329	0.0240299	14.6632	0.294617	13.5577	11.0389	1.73545	0.423414	0.0753926	0.0561177		873.565	484	246.313	0.82278		-11.5206	5.81379
σ								0.276701	0.127041	0.290982	0.0287496	0.185281	0.030355	0.168284	0.127013	0.0793646	0.0379731	0.0216562	0.00588583		7.045		16.1043			0.17776	0.203364
Check σ/σ%								ok	ok	0.0448656	ok	ok	ok	ok	ok	ok	ok	ok	ok				6.53812				3.49796
This work	1990 (B-III)	Summit extrusion, lava dome Novy, 1990	Bez-O4-3	phen 3	core-rim	4
N (number of measures)								7
Average 0-23 µm								44.4787	1.65529	10.8279	0.0142768	14.2924	0.25575	13.5613	11.1382	1.7022	0.474229	0.058212	0.0514839		869.125		270.237			-11.1742	6.52994
σ								0.263753	0.0410037	0.186858	0.0152734	0.223954	0.0163083	0.208478	0.235021	0.0754491	0.0180631	0.0224609	0.00573931		6.28661		11.7993			0.178246	0.27454
Check σ/σ%								ok	ok	ok	ok	ok	ok	ok	ok	ok	ok	ok	ok				4.3663				4.20433
N (number of measures)								23
Average 39-82 µm								45.9927	1.88332	9.07457	0.0326419	13.5476	0.261058	14.2751	11.1312	1.57767	0.407082	0.0710325	0.048645		852.813		190.432			-12.0581	5.48582
σ								0.55888	0.0815394	0.149422	0.0292641	0.234934	0.0334195	0.170789	0.142647	0.0571813	0.0276666	0.0174038	0.00491082		6.79765		6.97094			0.242025	0.217509
Check σ/σ%								0.150536	ok	ok	ok	ok	ok	ok	ok	ok	ok	ok	ok				3.6606				3.96493
Turn et al. (2013)°	December 16, 2009	post-climatic erupt., light-colored enclave	10IPE7b	phen #2	core spots
N (number of measures)								10
Average								40.2961	1.86985	14.2416		13.3846	0.162526	13.1329	11.7727	2.33513	0.425444	0.321643	0.032989		939.601	484	523.641	2.4098		-8.66945	8.40639
σ								0.389409	0.191642	0.0955845		0.399862	0.055215	0.233106	0.374543	0.138089	0.0291393	0.246612	0.0192941		11.5909		31.0255			0.464527	0.623399
Check σ/σ%								ok	0.0537575	ok		0.131146	ok	ok	0.117265	ok	ok	0.170689	ok				5.92496				7.41577
Turn et al. (2013)°	December 16, 2009	post-climatic erupt., light-colored enclave	10IPE7b	phen #3	core spots
N (number of measures)								10
Average								41.0463	1.80343	14.0565		13.0765	0.167313	13.3047	11.6657	2.45385	0.434349	0.235088	0.0212986		944.279	484	571.4	2.32677		-8.64446	8.36185
σ								0.42577	0.158429	0.112258		0.296751	0.056679	0.143553	0.164516	0.198711	0.0381038	0.236328	0.0141577		12.6008		52.9735			0.336147	0.507694
Check σ/σ%								0.032877	0.0222238	ok		0.0301478	ok	ok	ok	0.0475174	ok	0.16806	ok				9.27082				6.07155
Turn et al. (2013)°	June 1, 2010	post-climatic erupt., light-colored enclave	10IPE1b	phen #1	core spots
N (number of measures)								16
Average								42.4497	2.14522	11.2768		15.2218	0.254497	12.8812	11.2792	2.21609	0.4589	0.229169	0.0514573		899.956	484	285.641	1.20092		-10.6506	6.05509
σ								0.396803	0.206083	0.123488		0.496256	0.0690118	0.195941	0.329626	0.213005	0.0336866	0.247062	0.0152099		14.1342		10.9774			0.393355	0.605946
Check σ/σ%								ok	0.0616246	ok		0.215564	ok	ok	0.0760564	0.0669455	ok	0.179381	ok				3.84307				10.0072
°Turner, S.J.; Izbekov, P., Langmuir, C. The magma plumbing system of Bezymianny Volcano: Insights from a 54 year time series of trace element whole-rock geochemistry and amphibole compositions. J. Volcanol. Geotherm. Res. 2013, 263, 108–121.

## Sheet: Old Bezymianny
									Amphibole composition (wt%)													Amp-TB2.1 Physico-chemical parameters
Reference	Stage	Age BP (kys)	Info	Sample	Crystal	profile	step (µm)		SiO2	TiO2	Al2O3	Cr2O3	FeO	MnO	MgO	CaO	Na2O	K2O	F	Cl		T (°C)	error2	P (MPa)	ΔNNO	error^2	logfO2	H2Omelt (wt%)
This work	Pre-B	10-20?	eastern part of Raschlenenny lava dome	OB15-6	phen 1	core-rim	spots	Phase
N (number of measures)									5
Average core									41.3639	1.94773	14.2814	0.018247	12.2187	0.150476	14.1779	10.8648	3.05181	0.458646	0.746384	0.0185679		1041.68	484	1371.99	2.58166		-6.65569	6.69817
σ									0.260274	0.048335	0.14622		0.306256	0.0188702	0.287572	0.0867986	0.111105	0.0104995	0.336717	0.0112343		11.9377		163.755			0.344258	0.22647
Check σ/σ%									ok	ok	ok		0.0457152	ok	0.0135589	ok	ok	ok	0.23572	ok				11.9356				3.38107
This work	Pre-B	10-20?	Pravilny lava dome	OB40-3	phen 1	core-rim	spots	Phase
N (number of measures)									6
Average									41.667	1.95285	13.6355	0.0662508	15.7753	0.336784	11.8155	11.0299	2.35386	0.357082	0.055363	0.0355695		935.595	484	491.996	0.488972		-10.6511	7.06277
σ									0.250357	0.0186927	0.110679	0.0651085	0.305945	0.0225322	0.118162	0.122855	0.0843024	0.0212499	0.0432992	0.00293668		6.34951		17.2536			0.137497	0.172242
Check σ/σ%									ok	ok	ok	0.0206701	0.0218338	ok	ok	ok	ok	ok	0.00148479	ok				3.50686				2.43873
This work	Pre-B	10-20?	Pravilny lava dome	OB40-4	phen 1	core-rim	spots	Phase
N (number of measures)									7
Average									41.344	1.87766	13.3719	0.0337804	15.9095	0.320357	12.3204	10.6613	2.51164	0.327262	0	0		988.09	484	835.766	0.943578		-9.25325	6.42251
σ									0.292748	0.073056	0.179376	0.0158075	0.244688	0.0527907	0.139715	0.133493	0.189362	0.0206162	0	0		16.4203		120.436			0.364631	0.29336
Check σ/σ%									ok	ok	ok	ok	ok	ok	ok	ok	0.0369711	ok					#DIV/0!	14.4103				4.56768
This work	Pre-B	10-20?	Pravilny lava dome	OB40-4	phen 2	core-rim	spots	Phase
N (number of measures)									7
Average									39.9073	2.41144	15.3888	0.0262009	12.6322	0.113906	13.4391	10.9318	2.50431	0.429744	0	0		988.976	484	751.266	1.9198		-8.29293	7.16506
σ									0.27485	0.110921	0.124352	0.0177328	0.382644	0.0127482	0.234155	0.105893	0.0627847	0.0291408	0	0		8.22407		20.8207			0.238253	0.383761
Check σ/σ%									ok	ok	ok	ok	0.119146	ok	ok	ok	ok	ok					#DIV/0!	2.77141				5.356
This work	Pre-B	10-20?	Pravilny lava dome	OB40-4	phen 3	core-rim	spots	Phase
N (number of measures)									6
Average core									41.5509	1.94445	13.1649	0.0361198	15.8754	0.35154	12.2682	10.3871	2.58072	0.304744	0	0		1000.49	484	904.148	0.59206		-9.39193	5.95498
σ									0.161098	0.0268225	0.0379496		0.116565	0.0345096	0.123656	0.0782823	0.142058	0.0194214	0	0		13.7405	#DIV/0!	97.8508			0.156909	0.16064
Check σ/σ%									ok	ok	ok		ok	ok	ok	ok	ok	ok					#DIV/0!	10.8224				2.69757
This work	Pre-B	10-11	southern part of Zub lava dome	OB7-1	phen 1	core-rim	spots	Phase
N (number of measures)									6
Average									42.5129	1.75455	12.949	0.0363537	14.1695	0.343381	13.2424	11.0059	2.09783	0.380061	0.067914	0.0320677		932.821	484	459.369	1.25744		-9.95052	6.50815
σ									0.198233	0.0495458	0.130379	0.00972658	0.113652	0.0437101	0.143473	0.220107	0.119505	0.0286172	0.0290404	0.00347761		5.18672		4.40997			0.247458	0.242029
Check σ/σ%									ok	ok	ok	ok	ok	ok	ok	ok	ok	ok	ok	ok				0.960006				3.71886
This work	Pre-B	10-11	southern part of Zub lava dome	OB7-1	phen 2	core-rim	spots	Phase
N (number of measures)									7
Average									42.574	1.78218	12.866	0.032985	13.8708	0.290621	13.1369	11.1157	1.77048	0.36625	0.0733425	0.0269272		916.576	484	441.409	1.05753		-10.4329	7.06536
σ									0.461239	0.0424655	0.20924	0.0111823	0.243102	0.0275596	0.247662	0.127046	0.129378	0.0228596	0.0324258	0.00246531		6.51868		21.0549			0.200368	0.276665
Check σ/σ%									0.063448	ok	ok	ok	ok	ok	ok	ok	ok	ok	ok	ok				4.76993				3.9158
This work	Pre-B	10-11	southern part of Zub lava dome	OB7-1	phen 3	core-rim	spots	Phase
N (number of measures)									6
Average									42.0532	1.90077	13.4094	0.0374298	13.9816	0.256754	12.929	10.9254	2.1658	0.391828	0.0758065	0.030084		930.63	484	473.231	1.1322		-10.1077	7.00265
σ									0.352517	0.141583	0.396015	0.00794006	0.355667	0.0425257	0.168185	0.111056	0.0717114	0.0141596	0.0589325	0.00641054		9.39589		25.8912			0.267751	0.171578
Check σ/σ%									ok	0.00292893	0.127129	ok	0.0829469	ok	ok	ok	ok	ok	0.0124173	ok				5.47116				2.45018
This work	Pre-B	10-11	southern part of Zub lava dome	OB7-2	phen 1	core-rim	spots	Phase
N (number of measures)									6
Average									42.9473	1.68804	12.851	0.0416407	14.2015	0.347547	13.0842	10.9412	2.06515	0.356238	0.0701855	0.0322575		924.953	484	445.749	0.963901		-10.3833	6.66168
σ									0.297436	0.0494706	0.278043	0.0264006	0.0965116	0.023628	0.13967	0.0843327	0.226274	0.01487	0.0198252	0.00104871		6.9785		24.8708			0.198856	0.150024
Check σ/σ%									ok	ok	0.0130075	ok	ok	ok	ok	ok	0.0836666	ok	ok	ok				5.57956				2.25204
This work	Pre-B	10-11	northern part of Plotina lava dome	OB45-2	phen 1	core-rim	19	Phase
N (number of measures)									11
Average 0-250 µm									40.3496	1.78712	15.1571	0.00790705	16.0057	0.288223	11.1936	11.0697	2.62594	0.374469	0.0554715	0.0346066		985.842	484	1055.6	0.900911		-9.25938	8.52377
σ									0.139315	0.0309814	0.10763	0.0158141	0.302947	0.0236938	0.170809	0.12258	0.233159	0.0102619	0.0580079	0.00288588		19.4703		180.319			0.499498	0.282981
Check σ/σ%									ok	ok	ok	ok	0.017436	ok	ok	ok	0.0784509	ok	0.0161657	ok				17.0821				3.3199
N (number of measures)									6
Average 437-575 µm									41.8098	2.04955	14.4353	0.127682	10.7135	0.153983	14.9133	11.3411	2.56695	0.418875	0.12268	0.0151455		1017.9	484	996.116	2.5245		-7.16453	6.84566
σ									0.285598	0.047678	0.267221	0.0223668	0.224082	0.0129677	0.335394	0.141765	0.234824	0.0230546	0.220423	0.00211572		14.6264		165.274			0.442344	0.308481
Check σ/σ%									ok	ok	ok	ok	ok	ok	0.0566433	ok	0.0813035	ok	0.165662	ok				16.5919				4.50622
This work	Pre-B	10-11	northern part of Plotina lava dome	OB45-2	phen 2	core-rim	3	Phase
N (number of measures)									5
Average 3-23 µm									40.5744	1.83244	14.972	0.0247411	16.2544	0.34253	10.8747	10.7906	2.27936	0.339092	0.0422961	0.0356247		967.835	484	879.147	0.198622		-10.3044	8.16193
σ									0.441069	0.0724482	0.173049	0.0339528	0.261601	0.0293667	0.268319	0.15445	0.180365	0.0196538	0.0313705	0.00317949		18.6529		122.477			0.350853	0.425683
Check σ/σ%									0.049713	ok	ok	0.00212959	ok	ok	0.01787	ok	0.0329052	ok	ok	ok				13.9313				5.21546
This work	Pre-B	10-11	northern part of Plotina lava dome	OB45-2	phen 3	core-rim	18	Phase
N (number of measures)									6
Average 0-140 µm									40.7277	2.13613	13.6741	0.024175	14.3665	0.23305	11.9791	10.9397	2.336	0.4186	0.05106	0.0277333		940.605	484	521.651	0.83961		-10.226	7.309
σ									0.16668	0.0237859	0.180568	0.0189032	0.0819536	0.0461925	0.137174	0.0999033	0.101286	0.0128	0.0165859	0.00233381		12.2098		52.0435			0.235487	0.326955
Check σ/σ%									ok	ok	ok	ok	ok	ok	ok	ok	ok	ok	ok	ok				9.9767				4.47333
This work	B	3.3-5.5	lava dome Expeditsii, south-eastern slope	OB2-3	phen 2	core-rim	7	Phase
N (number of measures)									18
Average 0-157 µm									44.9974	1.51172	10.7191	0.0337336	14.6764	0.410738	13.3732	10.1798	1.60265	0.331757	0	0		886.225	484	300.13	0.279114		-11.8111	5.5377
σ									0.354843	0.159551	0.315588	0.030321	0.336572	0.0555376	0.282137	0.366076	0.183521	0.0281776	0	0		9.989		28.1425			0.561278	0.27799
Check σ/σ%									ok	0.031254	0.0663593	ok	0.0593308	ok	0.0134988	0.121171	0.0526583	ok					#DIV/0!	9.37678				5.01996
This work	B	3.3-5.5	lava dome Expeditsii, south-eastern slope	OB2-3	phen 3	core-rim	spots	Phase
N (number of measures)									5
Average core									44.2264	1.40966	11.7064	0.016282	15.0305	0.436882	13.2465	10.3491	1.75456	0.308215	0.037191	0.0479205		906.118	484	376.856	0.531373		-11.1754	5.85635
σ									0.270169	0.058064	0.242974	0.0225295	0.208217	0.0267318	0.170058	0.104011	0.153188	0.0135429	0.0547457	0.00180607		3.14635		12.7175			0.141837	0.257106
Check σ/σ%									ok	ok	ok	ok	ok	ok	ok	ok	0.0182456	ok	0.018207	ok				3.37463				4.3902
N (number of measures)									5
Average rim									45.3241	1.47591	10.3076	0.00993762	14.9771	0.36916	13.4963	10.2135	1.76385	0.319419	0.0512589	0.046989		874.618	484	262.173	0.340911		-11.8641	5.57019
σ									0.294056	0.0889388	0.244505	0.0120254	0.163936	0.035023	0.214128	0.108054	0.174156	0.0191445	0.033857	0.00365268		9.99709		15.4019			0.371568	0.240119
Check σ/σ%									ok	ok	ok	ok	ok	ok	ok	ok	0.0389717	ok	ok	ok				5.87473				4.31079
This work	B	3.3-5.5	lava dome Expeditsii, south-eastern slope	OB2-4	phen 2	core-rim	2	Phase
N (number of measures)									27
Average 0-55 µm									44.5938	1.07064	10.2993	0.03896	15.7487	0.653904	12.9398	9.48259	1.52892	0.310044	0.063175	0.0740815		893.75	484	306.61	1.60721		-10.3456	5.45958
σ									0.296931	0.0325886	0.116552	0.024064	0.136632	0.0485591	0.180455	0.144261	0.0689875	0.0138581	0.0329365	0.00321774		6.74596		8.94097	0.43685		0.492191	0.262933
Check σ/σ%									ok	ok	ok	ok	ok	ok	ok	ok	ok	ok	ok	ok				2.91607				4.816
N (number of measures)									7
Average 123-136 µm									41.1471	2.1336	13.2032	0.03156	13.2853	0.184829	12.954	11.1965	2.23754	0.3544		0.0204714		936.28	#DIV/0!	458.503	1.23735		-9.9267	7.16397
σ									0.265127	0.0700869	0.17383	0.0386118	0.214409	0.028778	0.213968	0.126142	0.030354	0.0151367		0.00336636		9.15539	#DIV/0!	21.8988	0.229071		0.28577	0.311479
Check σ/σ%									ok	ok	ok	0.0040511	ok	ok	ok	ok	ok	ok		ok			#DIV/0!	4.77616				4.34785
N (number of measures)									15
Average 151-181 µm									42.8074	2.17595	11.7769	0.0383429	11.5805	0.170587	14.9284	10.8447	2.21851	0.300547	0.299512	0.0169133		943.369	484	379.391	1.62556		-9.45161	5.54243
σ									0.302641	0.0611734	0.122995	0.0278988	0.249163	0.0430574	0.247986	0.115749	0.0555854	0.0121518	0.169631	0.00234174		8.0921		13.2515	0.135932		0.229073	0.280284
Check σ/σ%									ok	ok	ok	ok	ok	ok	ok	ok	ok	ok	0.0955207	ok				3.49285				5.05706
This work	B	3.3-5.5	lava dome Expeditsii, south-eastern slope	OB2-4	phen 3	core-rim	2	Phase
N (number of measures)									5
Average 35-44 µm									42.2074	2.0337	12.5599	0.0259333	12.5611	0.18516	14.1069	10.5303	2.21486	0.29508	0.0763	0.01752		942.504	484	435.215	1.35099		-9.7135	6.01424
σ									0.217554	0.035484	0.107274	0.020696	0.218527	0.0328269	0.11699	0.195068	0.0714242	0.0179565	0.0682978	0.00230152		6.17531		14.4923			0.134667	0.107721
Check σ/σ%									ok	ok	ok	ok	ok	ok	ok	ok	ok	ok	0.0216802	ok				3.32991				1.7911
N (number of measures)									15
Average 51-81 µm									42.8551	1.99604	12.1872	0.0231833	11.6983	0.163731	14.9335	10.4311	2.2386	0.277294	0.138864	0.0170313		945.383	484	422.999	1.62732		-9.39313	5.66692
σ									0.24288	0.0518896	0.219616	0.0131747	0.150952	0.0428422	0.169355	0.174809	0.0573256	0.0173814	0.181375	0.00532976		8.48712		31.6822			0.241477	0.354614
Check σ/σ%									ok	ok	ok	ok	ok	ok	ok	ok	ok	ok	0.124265	ok				7.4899				6.25761
N (number of measures)									7
Average 13-20,103-107 µm									42.2413	2.1101	12.6463	0.0649	10.7873	0.147114	15.0798	11.1112	2.2953	0.330914	0.069625	0.0213571		955.065	484	456.791	2.1112		-8.72388	6.13785
σ									0.198389	0.0612275	0.2094	0.0226274	0.193708	0.020574	0.106814	0.226299	0.0415009	0.020298	0.0638075	0.0147149		10.2664		25.3027			0.164217	0.391754
Check σ/σ%									ok	ok	ok	ok	ok	ok	ok	ok	ok	ok	0.0186145	ok				5.53924				6.3826
This work	B	3.3-5.5	lava dome Expeditsii, south-eastern slope	OB2-4	phen 4	core-rim	4	Phase
N (number of measures)									5
Average 0-11 µm									43.4157	2.12996	11.3112	0.052	11.2893	0.17736	15.5381	10.2494	2.17934	0.25102	0.053175	0.01296		948.458	484	368.088	1.51629		-9.47571	4.86219
σ									0.354433	0.0578392	0.11547	0.0192906	0.202726	0.0233286	0.221562	0.254255	0.0635447	0.0127737	0.0391312	0.00143283		1.60387		5.06464			0.098031	0.268055
Check σ/σ%									ok	ok	ok	ok	ok	ok	ok	0.00878302	ok	ok	ok	ok				1.37593				5.51304
This work	B	3.3-5.5	Greben lava dome, southern slope	OB34-1	phen 1	core-rim	5	Phase
N (number of measures)									7
Average 5-37 µm									41.056	2.30373	13.7507	0.0271571	11.7182	0.152729	14.3559	10.7991	2.39651	0.367871	0.0345714	0.0144714		981.202	484	601.36	1.92507		-8.46998	6.12655
σ									0.363368	0.0432104	0.128301	0.0279134	0.23698	0.0331137	0.268912	0.133955	0.210936	0.0195763	0.0215299	0.00241434		6.79719		39.2016			0.226904	0.27719
Check σ/σ%									ok	ok	ok	ok	ok	ok	ok	ok	0.0609499	ok	ok	ok				6.51882				4.52441
N (number of measures)									6
Average 88-120 µm									41.9025	2.36387	12.5107	0.0349167	12.5035	0.13935	14.0191	11.0357	2.21808	0.37435	0.0867333	0.01655		946.24	484	431.517	1.47812		-9.53275	6.10084
σ									0.107499	0.0624119	0.194658	0.023637	0.30831	0.0183316	0.31181	0.103314	0.155393	0.0118826	0.0315479	0.00183712		8.7564		21.1547			0.292218	0.187137
Check σ/σ%									ok	ok	ok	ok	0.0457264	ok	0.0388421	ok	0.0092889	ok	ok	ok				4.90241				3.0674
This work	B	3.3-5.5	Greben lava dome, southern slope	OB34-1	phen 2	core-rim	3	Phase
N (number of measures)									5
Average 55-64 µm									42.104	2.39354	13.7168	0.0447848	11.845	0.139696	14.3963	11.2101	2.26737	0.364822	0.0699006	0.0167256		960.26	484	504.608	1.61081		-9.14658	6.43622
σ									0.252192	0.0283035	0.0977233	0.0424938	0.242275	0.0218162	0.219559	0.218125	0.0691719	0.014052	0.101126	0.00148478		7.08768		27.045			0.151054	0.397965
Check σ/σ%									ok	ok	ok	0.00357968	ok	ok	ok	ok	ok	ok	0.0558719	ok				5.35961				6.18321
This work	B	3.3-5.5	Greben lava dome, southern slope	OB34-1	phen 3	core-rim	2	Phase
N (number of measures)									5
Average 53-62 µm									41.833	2.19516	13.254	0.0237305	11.9387	0.119836	14.685	11.0369	2.18619	0.354428	0.0733425	0.0145107		952.368	484	470.531	2.05492		-8.84109	6.35195
σ									0.105083	0.0824234	0.179718	0.0279303	0.219465	0.0236715	0.117494	0.23606	0.085091	0.00780352	0.0283979	0.000835726		5.55216		16.3685			0.169245	0.309073
Check σ/σ%									ok	ok	ok	ok	ok	ok	ok	ok	ok	ok	ok	ok				3.47874				4.86579
This work	B	3.3-5.5	Greben lava dome, southern slope	OB34-1	phen 4	core-rim	4	Phase
N (number of measures)									5
Average 4-26 µm									41.3329	1.5077	14.8635	0.0173269	14.8166	0.16126	12.2446	10.7225	2.1598	0.427469	0.0335912	0.0173018		916.606	484	552.271	1.51922		-9.94012	9.01382
σ									0.195521	0.0747421	0.177337	0.0229806	0.212242	0.0126974	0.193071	0.128969	0.0782304	0.0107619	0.0248455	0.00265285		11.691		41.9524			0.290409	0.418863
Check σ/σ%									ok	ok	ok	ok	ok	ok	ok	ok	ok	ok	ok	ok				7.59633				4.6469
N (number of measures)									5
Average 108-122 µm									41.9725	2.02067	13.5509	0.031441	13.186	0.167142	13.5941	11.041	2.32617	0.396914	0.120235	0.0231219		944.619	484	505.45	1.63645		-9.37367	6.97886
σ									0.372008	0.0632283	0.160027	0.0497903	0.222935	0.0555102	0.198339	0.0505381	0.10451	0.0514749	0.045282	0.00425648		12.0836		43.4915			0.306196	0.236423
Check σ/σ%									ok	ok	ok	0.0152738	ok	ok	ok	ok	ok	ok	ok	ok				8.60451				3.3877
This work	B	3.3-5.5	base of Raschlenenny lava dome, basaltic andesite	OB21-5	cumulus 7	core-rim	12	Phase
N (number of measures)									50
Average 108-122 µm							xen		42.313	2.11598	13.7314	0.0521266	10.5888	0.124254	15.4714	11.411	2.44893	0.404685	0.146071	0.00974142		978.035	484	587.276	2.69587		-7.75327	6.46769
σ									0.220303	0.0515704	0.150641	0.0359106	0.185989	0.0315746	0.145687	0.168655	0.0596264	0.0202842	0.252168	0.0033348		7.25097		25.9752			0.193619	0.227486
Check σ/σ%									ok	ok	ok	ok	ok	ok	ok	ok	ok	ok	0.19407	ok				4.42301				3.51727
This work	B	3.3-5.5	lava dome Expeditsii, top	OB-102B	phen 1	core-rim	40	Phase
N (number of measures)									10
Average 0-364 µm									40.4047	1.84974	15.3369	0.0142701	15.5091	0.227251	11.5884	11.121	2.49903	0.41456	0.0505313	0.0269721		977.223	484	964.553	1.20582		-9.11811	8.6991
σ									0.34264	0.0451037	0.225508	0.0281163	0.182553	0.0221495	0.117554	0.234649	0.0743517	0.0231756	0.029587	0.00324491		11.7288		116.003			0.275351	0.292493
Check σ/σ%									ok	ok	ok	0.00170889	ok	ok	ok	ok	ok	ok	ok	ok				12.0266				3.36234
N (number of measures)									7
Average 423-494 µm									40.7774	2.13541	15.0342	0.0237278	13.2717	0.160233	13.2343	11.3334	2.51951	0.406126	0.090849	0.0190736		993.55	484	901.804	1.85592		-8.24347	7.69587
σ									0.153681	0.0581697	0.092243	0.0272076	0.163814	0.0231421	0.114742	0.236927	0.0740777	0.00770067	0.104792	0.00436246		8.91291		85.0162			0.226182	0.274176
Check σ/σ%									ok	ok	ok	ok	ok	ok	ok	ok	ok	ok	0.0553334	ok				9.42736				3.56264
This work	B	3.3-5.5	lava dome Expeditsii, top	OB-102B	phen 2	core-rim	4	Phase
N (number of measures)									11
Average 0-43 µm									40.7142	2.1487	14.7574	0.0163075	13.9866	0.180599	12.7406	11.1309	2.48688	0.420579	0.12053	0.0189781		987.118	484	867.937	1.53055		-8.67746	7.54313
σ									0.167025	0.0602857	0.187573	0.025418	0.196172	0.0276431	0.143052	0.119174	0.0604713	0.0502916	0.178167	0.00278231		7.31686		65.9695			0.304201	0.227479
Check σ/σ%									ok	ok	ok	ok	ok	ok	ok	ok	ok	ok	0.123734	ok				7.60072				3.01571
N (number of measures)									9
Average 47-82 µm									40.354	2.16889	14.8468	0.0264192	14.6652	0.192291	12.3684	11.069	2.52118	0.371839	0.0580067	0.02185		992.27	484	902.97	1.27516		-8.8423	7.54948
σ									0.359299	0.0391366	0.119348	0.0228115	0.222607	0.0140501	0.187533	0.103962	0.0865286	0.0265635	0.0217676	0.0025544		7.60607		47.5857			0.219773	0.296778
Check σ/σ%									ok	ok	ok	ok	ok	ok	ok	ok	ok	ok	ok	ok				5.26991				3.93111
N (number of measures)									18
Average 133-206 µm									39.7761	2.22471	16.1775	0.0194219	12.0245	0.134632	13.6787	11.302	2.58721	0.463172	0.0387567	0.0161632		997.085	484	854.955	2.47429		-7.58911	7.83298
σ									0.211739	0.0325367	0.119005	0.0209451	0.194287	0.0307578	0.145083	0.181591	0.0480323	0.0120194	0.0422852	0.00259692		7.40897		72.4171			0.220433	0.278055
Check σ/σ%									ok	ok	ok	ok	ok	ok	ok	ok	ok	ok	0.00523218	ok				8.47028				3.5498
N (number of measures)									6
Average 219-241 µm									39.8208	2.18972	15.8288	0.0167654	12.171	0.140833	13.8425	11.2888	2.59803	0.429444	0.0552667	0.0176122		1000.33	484	853.434	2.53513		-7.48147	7.56528
σ									0.0883114	0.0361264	0.0690733	0.0186235	0.217928	0.0330856	0.144106	0.186509	0.0485013	0.00736909	0.0734065	0.00337824		10.1478		92.4543			0.299874	0.324509
Check σ/σ%									ok	ok	ok	ok	ok	ok	ok	ok	ok	ok	0.0316167	ok				10.8332				4.28945
This work	B	3.3-5.5	lava dome Expeditsii, top	OB-102B	phen 3	core-rim	3	Phase
N (number of measures)									4
Average 0-8 µm									42.2675	1.77628	14.4206	0.0522614	11.3016	0.127487	14.7905	10.9634	2.53054	0.374835	0.052899	0.0200014		1001.57	484	962.729	2.43554		-7.52428	7.19849
σ									0.208174	0.0396569	0.165894	0.0430074	0.0793969	0.0198836	0.0969307	0.055279	0.117585	0.0205153	0.0605206	0.00368492		15.8261		133.215			0.374026	0.131265
Check σ/σ%									ok	ok	ok	0.00200232	ok	ok	ok	ok	ok	ok	0.0193466	ok				13.8372				1.82351
N (number of measures)									27
Average 14-91 µm									40.2162	2.19281	16.4976	0.0296631	11.8417	0.123311	13.7686	11.3978	2.57112	0.488326	0.0489977	0.0161882		1023.63	484	1272.81	2.4942		-7.03602	8.15917
σ									0.144604	0.0395983	0.132767	0.0281705	0.201279	0.0258533	0.141481	0.15395	0.0835855	0.0165575	0.0390921	0.00301742		11.9012		125.835			0.304311	0.252296
Check σ/σ%									ok	ok	ok	ok	ok	ok	ok	ok	ok	ok	ok	ok				9.88638				3.09218
N (number of measures)									4
Average 154-163 µm									41.438	1.83711	14.2844	0.0181535	14.9094	0.235901	12.3111	11.1628	2.28786	0.376785	0.0891082	0.0274016		932.005	484	525.564	1.16776		-10.0411	7.97343
σ									0.210807	0.0360478	0.266033	0.0222334	0.161816	0.0297494	0.0700418	0.120513	0.0396491	0.0114179	0.0708086	0.00298824		7.80698		48.2903			0.149072	0.329192
Check σ/σ%									ok	ok	ok	ok	ok	ok	ok	ok	ok	ok	0.021673	ok				9.18829				4.12862
This work	B	3.3-5.5	lava dome Expeditsii, top	OB-102B	cumulus 2	core-rim	10	Phase
N (number of measures)									12
Average 0-110 µm									45.0775	1.37938	11.835	0.409052	9.11842	0.110227	16.2993	11.9277	1.92011	0.497363	0.0414934	0.0267962		936.863	484	408.955	3.05377		-8.11983	7.13278
σ									0.265021	0.0367754	0.186829	0.0379965	0.197319	0.0414617	0.15207	0.130099	0.0524143	0.00896793	0.0182639	0.00326438		11.1079		29.8014			0.258469	0.273769
Check σ/σ%									ok	ok	ok	ok	ok	ok	ok	ok	ok	ok	ok	ok				7.28719				3.83818
This work	B	3.3-5.5	lava dome Expeditsii, top	OB-102B	cumulus 3	core-rim	25	Phase
N (number of measures)									20
Average 0-469 µm									42.6976	1.90875	13.5935	0.0560979	10.2318	0.117705	15.288	11.4768	2.3263	0.520241	0.0609551	0.0113229		960.223	484	573.452	2.91612		-7.81695	7.05065
σ									0.259347	0.0687655	0.102798	0.0390638	0.192919	0.0211338	0.184565	0.174566	0.0530992	0.0194483	0.030995	0.00276221		8.04685		28.1184			0.205244	0.295657
Check σ/σ%									ok	ok	ok	ok	ok	ok	ok	ok	ok	ok	ok	ok				4.90335				4.19333
This work	B	3.3-5.5	lava dome Expeditsii, top	OB-101B	phen 1	rim-rim	25	Phase
N (number of measures)									9
Average 42-70 µm									39.5954	2.22039	16.5332	0.0123726	15.4173	0.293519	10.813	11.0015	2.51747	0.378963	0.0262442	0.0211255		961.551	484	720.274	0.299162		-10.3563	8.69129
σ									0.355903	0.0530723	0.200422	0.015429	0.307714	0.0362188	0.24139	0.197517	0.0396625	0.021459	0.0168013	0.00579818		12.5104		86.5373			0.40157	0.457883
Check σ/σ%									ok	ok	ok	ok	0.0258047	ok	ok	ok	ok	ok	ok	ok				12.0145				5.2683
N (number of measures)									25
Average 0-32,92-117 µm									40.6416	2.07924	15.4932	0.0417979	13.1256	0.156084	13.1334	11.2622	2.44881	0.408069	0.0460198	0.0170527		968.5	484	691.212	1.82214		-8.73756	8.0459
σ									0.280428	0.0863086	0.163039	0.0299778	0.345518	0.0211925	0.255399	0.185688	0.0611605	0.0252475	0.0366478	0.00280872		9.80623		62.7937			0.293894	0.22061
Check σ/σ%									ok	ok	ok	ok	0.0785762	ok	ok	ok	ok	ok	ok	ok				9.08458				2.74189
This work	B-II	1-1.35	lava dome Lokhmaty, southern part	OB16-1	phen 1	core-rim	spots	Phase
N (number of measures)									4
Average									43.0744	1.69087	12.1133	0.0255459	14.1084	0.315323	13.3805	10.8937	1.8502	0.38651	0.0804746	0.0367425		913.602	484	396.276	1.1723		-10.3983	6.4152
σ									0.301253	0.211039	0.247983	0.0334701	0.145562	0.0462971	0.0719095	0.130159	0.156742	0.0421882	0.0434474	0.0117845		10.023		24.9479			0.209181	0.0768932
Check σ/σ%									ok	0.0777776	ok	0.00129976	ok	ok	ok	ok	0.0193501	ok	ok	ok				6.29557				1.19861
This work	B-II	1-1.35	lava dome Lokhmaty, southern part	OB16-1	phen 1	core-rim	spots	Phase
N (number of measures)									5
Average									44.0212	1.53926	11.5345	0.015889	14.3794	0.32741	13.5258	10.7039	1.90086	0.344501	0.0416724	0.042642		897.924	484	337.184	0.977912		-10.8891	6.20622
σ									0.327785	0.174723	0.18455	0.0355288	0.210494	0.0809982	0.18726	0.228326	0.14619	0.0174434	0.0350893	0.00593886		8.86573		24.5401			0.181342	0.276943
Check σ/σ%									ok	0.0456386	ok	0.0081417	ok	0.00461625	ok	ok	0.00753409	ok	ok	ok				7.27796				4.46234
This work	B-II	1-1.35	lava dome Lokhmaty, southern part	OB16-1	phen 4	core-rim	spots	Phase
N (number of measures)									6
Average									41.6165	1.72501	14.8279	0.0594198	11.51	0.145028	14.2662	11.1892	2.44595	0.411599	0.0437167	0.0155423		994.344	484	960.434	2.48477		-7.58231	7.87095
σ									0.456027	0.0503337	0.157573	0.0380697	0.135365	0.0150212	0.242958	0.171337	0.136753	0.0338519	0.0466617	0.00300204		13.9263		122.537			0.346894	0.261181
Check σ/σ%									0.0612919	ok	ok	ok	ok	ok	ok	ok	ok	ok	0.00806469	ok				12.7585				3.31829
This work	B-II	1-1.35	lava dome Lokhmaty, southern part	M1461-3	phen 2	core-rim	2	Phase
N (number of measures)									24
Average 0-57 µm							0-57		42.0636	2.13789	14.1509	0.0422762	12.516	0.143441	13.6742	11.0983	2.32229	0.385987	0.0470085	0.0191949		950.252	484	542.826	1.47167		-9.43265	7.2455
σ									0.193174	0.0391675	0.136387	0.0439334	0.113181	0.0255274	0.117946	0.163817	0.0749446	0.0183339	0.035212	0.00273682		10.0585		40.1941			0.258625	0.241511
Check σ/σ%									ok	ok	ok	0.00577231	ok	ok	ok	ok	ok	ok	ok	ok				7.40459				3.33326
N (number of measures)									14
Average 94-126 µm							94-126		41.8059	2.30889	14.6157	0.0695927	11.0466	0.116107	14.3529	11.4182	2.3776	0.409657	0.0392267	0.015695		970.128	484	603.249	1.90907		-8.65772	7.21358
σ									0.266496	0.0366681	0.108036	0.0507606	0.156532	0.0264224	0.184098	0.155463	0.0603706	0.0151453	0.0281034	0.00317055		10.2784		50.8573			0.211856	0.294966
Check σ/σ%									ok	ok	ok	0.00557463	ok	ok	ok	ok	ok	ok	ok	ok				8.43056				4.08904
N (number of measures)									29
Average 131-195 µm							131-195		41.6002	2.15955	14.4267	0.0452869	12.3665	0.146204	13.5716	11.0576	2.29925	0.385764	0.0483223	0.0201271		954.544	484	566.475	1.48779		-9.33937	7.3335
σ									0.209069	0.0608148	0.196571	0.0414912	0.158077	0.0314389	0.184281	0.177306	0.060368	0.0180102	0.0386752	0.00234929		11.0797		48.8289			0.274107	0.299304
Check σ/σ%									ok	ok	ok	0.00242972	ok	ok	ok	ok	ok	ok	ok	ok				8.61978				4.08133
N (number of measures)									13
Average 239-266 µm							239-266		41.3222	1.89002	14.0862	0.0249309	14.0835	0.182144	12.4442	11.076	2.18486	0.390142	0.0344355	0.0293792		925.089	484	498.494	1.18814		-10.1473	8.13962
σ									0.311213	0.0583228	0.320863	0.0301856	0.170123	0.0404294	0.193096	0.132673	0.0653239	0.0180265	0.024513	0.00368372		8.87661		25.5179			0.172162	0.500553
Check σ/σ%									ok	ok	0.0474523	ok	ok	ok	ok	ok	ok	ok	ok	ok				5.119				6.14959
